# Supplementary material for: Dakar Niño under global warming investigated by a high-resolution regionally coupled model
Source: Copernicus journal article supplement (doi:10.5194/esd-15-1401-2024), 2024-11-08
Supplement: Supplementary file 1 [file esd-15-1401-2024-supplement.pdf]

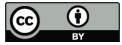

*Supplement of*

## **Dakar Niño under global warming investigated by a high-resolution regionally coupled model**

**Shunya Koseki et al.**

*Correspondence to:* Shunya Koseki ([shunya.koseki@uib.no](mailto:shunya.koseki@uib.no))

The copyright of individual parts of the supplement might differ from the article licence.

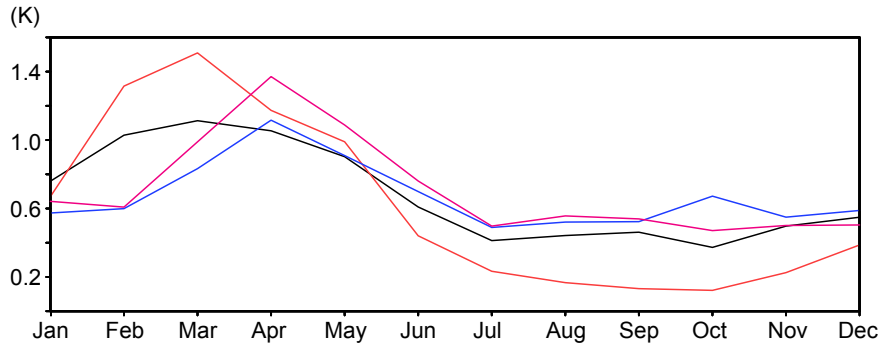

**Figure S1.** Time series of monthly SST standard deviation averaged over the Dakar Index box: ERA5 (black), ESA (red), ROM<sub>P</sub> (blue), and ROM<sub>F</sub> (magenta).

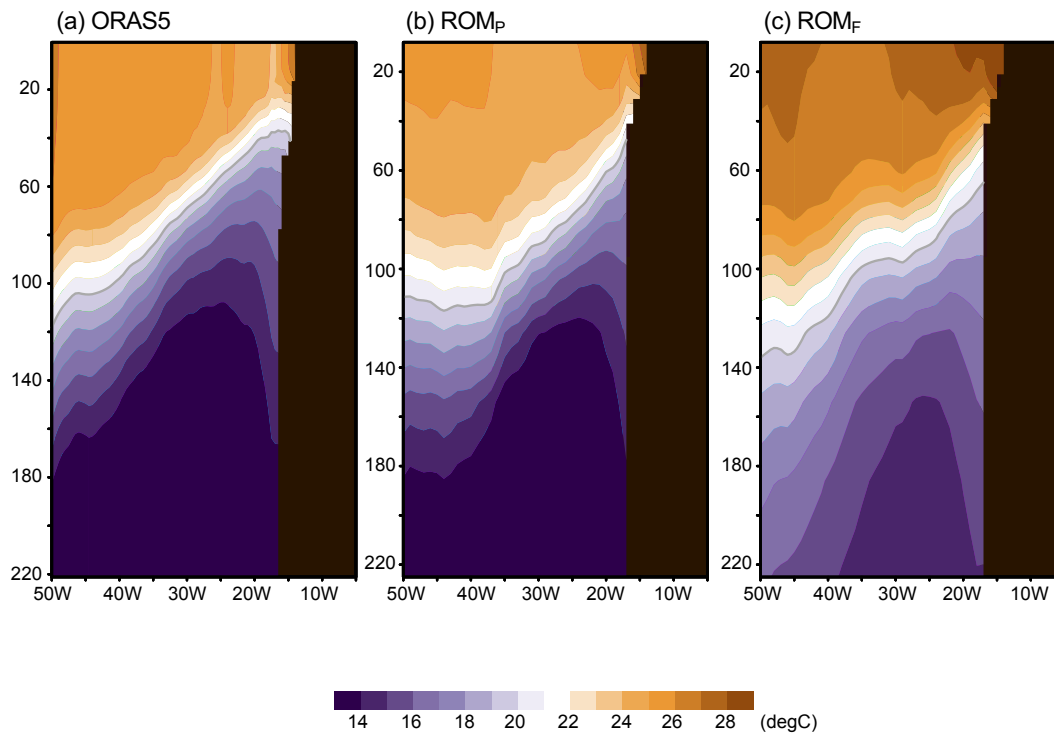

**Figure S2.** Depth-longitude section of climatological ocean temperature in March averaged between 9N and 12N for (a) ORAS5 reanalysis, (b) ROM<sub>P</sub>, and (c) ROM<sub>F</sub>, respectively. The gray contour denotes the ocean temperature of 20C, a proxy for the thermocline depth.

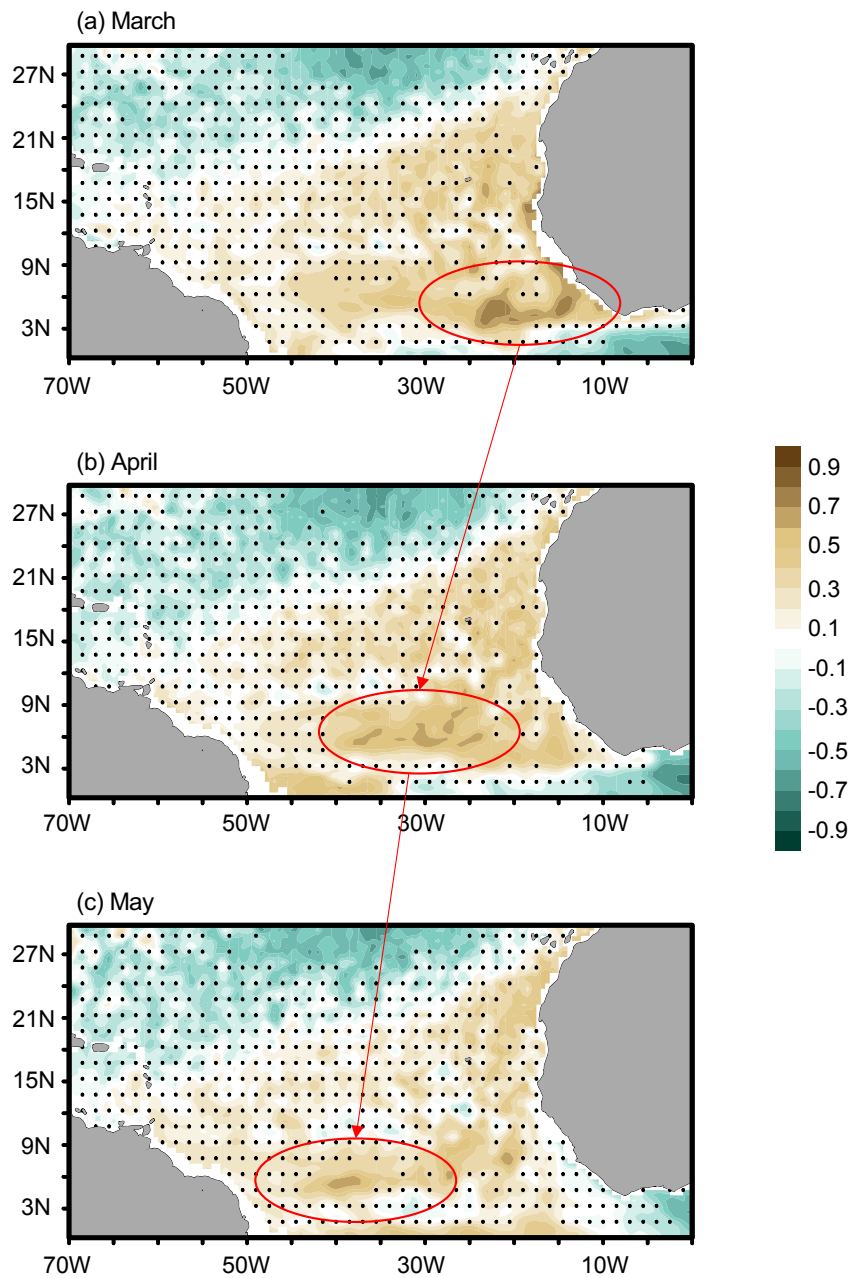

**Figure S3.**

Lag-correlation plots between March Dakar Index (SST over 9°N-14°N and 21°W-17°W) and ocean temperature at 41m depth in ROM<sub>p</sub> from March to May. Dots denote no significance of correlation. The red circle and arrow are the highest correlation and indication of westward propagation by eye.

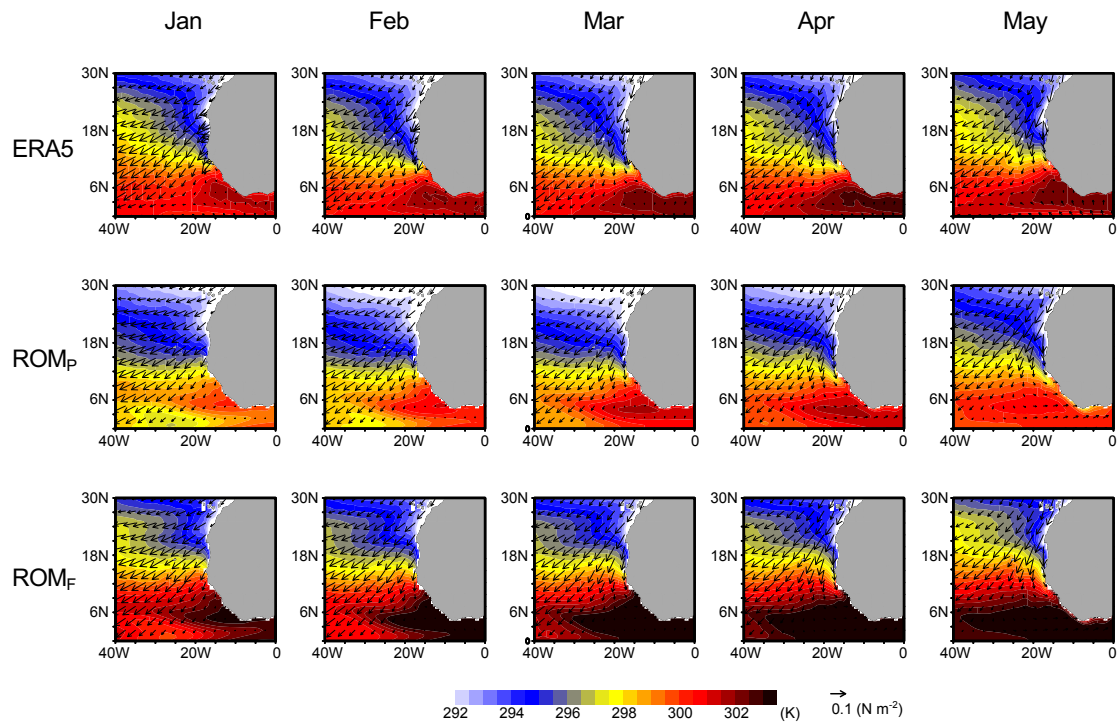

**Figure S4.** Climatolgy of SST and wind stress for ERA5 (top), ROM<sub>P</sub> (middle), and ROM<sub>F</sub> (bottom) from January to May.

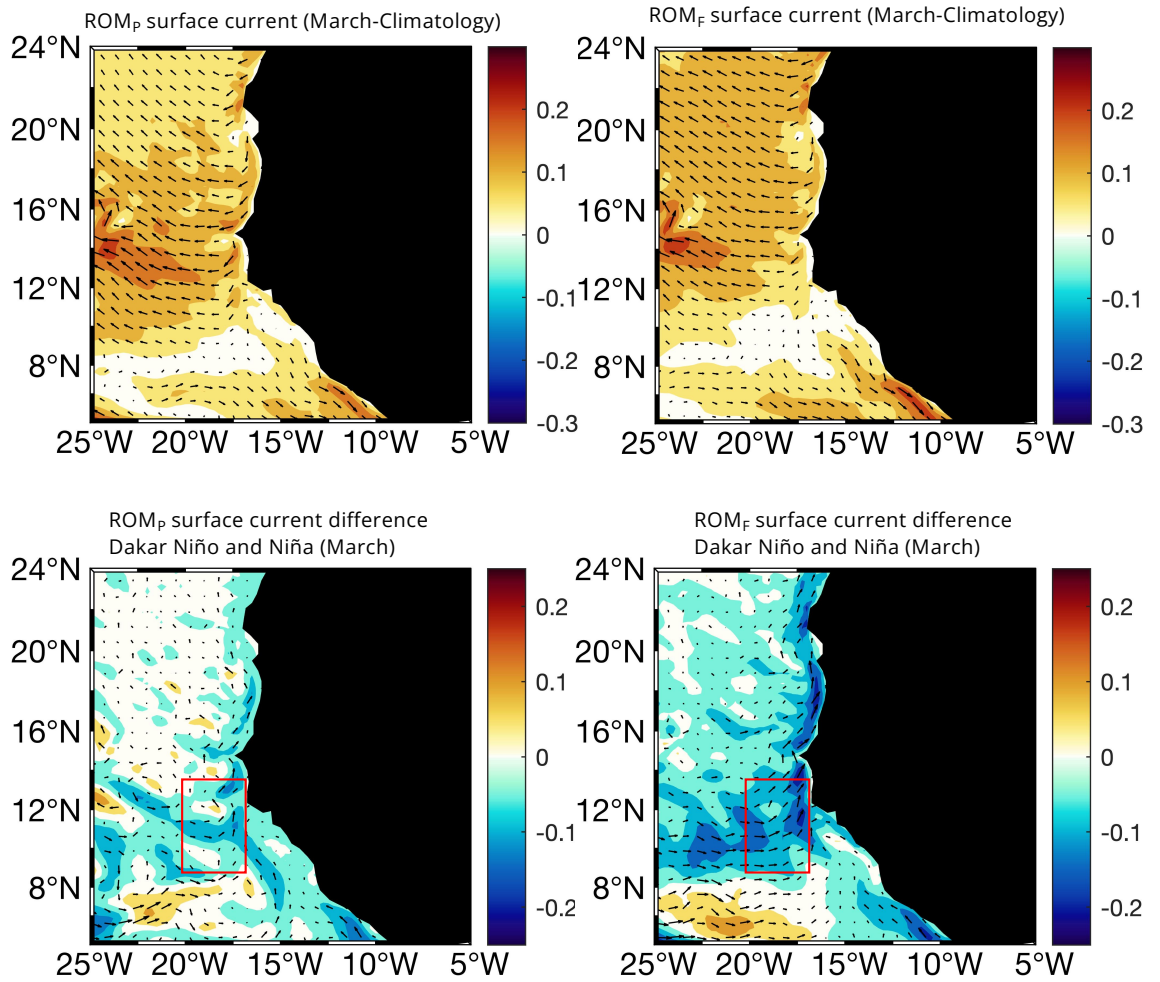

**Figure S5.** (Top) surface ocean current climatology for (a) ROM<sub>P</sub> and (b) ROM<sub>F</sub>. (Bottom) surface ocean current difference between Dakar Niño and Niña composite for (c) ROM<sub>P</sub> and (d) ROM<sub>F</sub>. Vector denotes the ocean current and color is ocean current velocity.

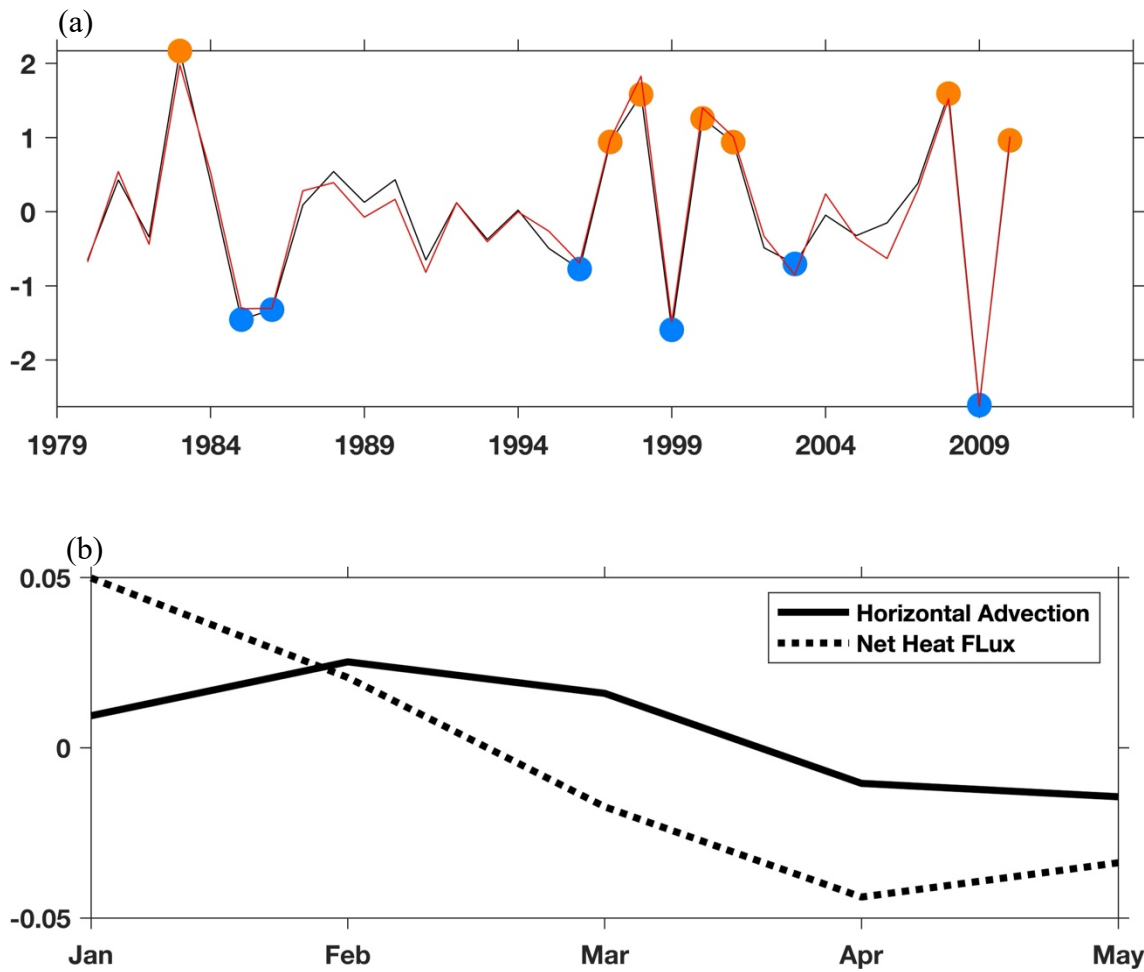

**Figure S6.** (a) Time series of Dakar Index (detrended SST averaged 9°N-14°N and 20°W-17°W) for ERA5 (black) and ORAS5 (red). The orange and blue dots indicate Dakar Niño and Niña events, respectively. (b) Lag-composite anomaly of heat budget in ORAS5 between Dakar Niños and Dakar Niñas. March is lag=0. The unit is  $K \text{ day}^{-1}$ .

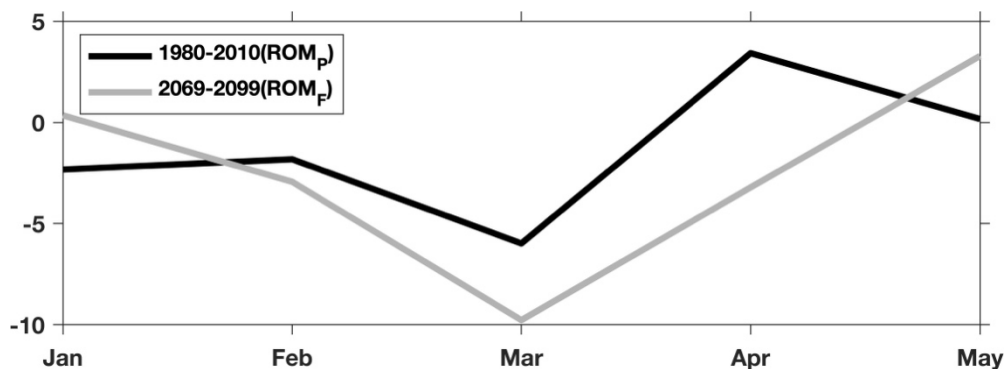

**Figure S7.** Monthly time series of lag-composite difference of ocean mixing layer depth between Dakar Niño and Dakar Niña events (Niño minus Niña) in (black) 1980-2010 and (grey) 2069-2099. March is lag=0. The unit is m
